# Supplementary material for: Single-cell RNA sequencing of the retina in a model of retinitis pigmentosa reveals early responses to degeneration in rods and cones
Source: PubMed Central journal article supplement (PMC9006580; doi:10.1186/s12915-022-01280-9), 2022-04-12

*rd10* mouse 1

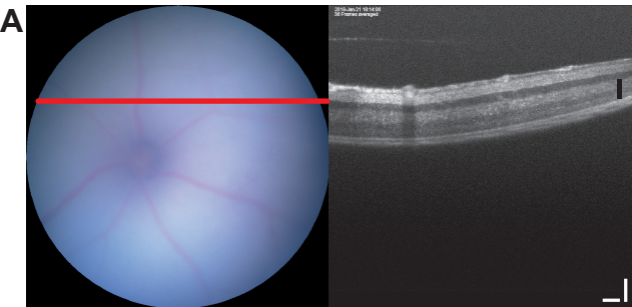

*rd10* mouse 2

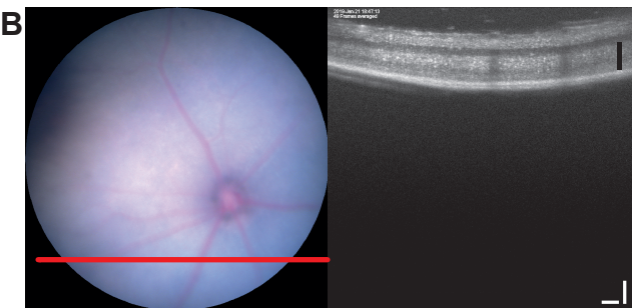

wild type

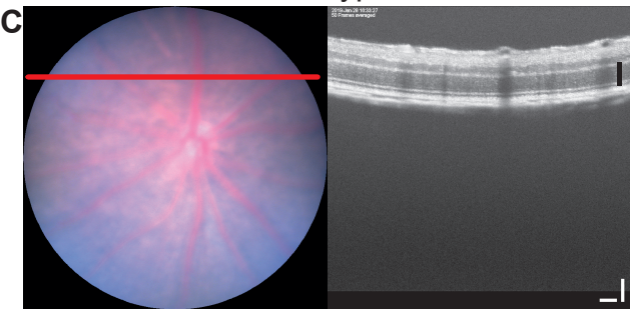

Supplement: 12915_2022_1280_MOESM1_ESM.pdf [file 12915_2022_1280_MOESM1_ESM.pdf]
