# Supplementary material for: Single-cell RNA sequencing of the retina in a model of retinitis pigmentosa reveals early responses to degeneration in rods and cones
Source: PubMed Central journal article supplement (PMC9006580; doi:10.1186/s12915-022-01280-9), 2022-04-12

Genotype  BL6  *rd10*

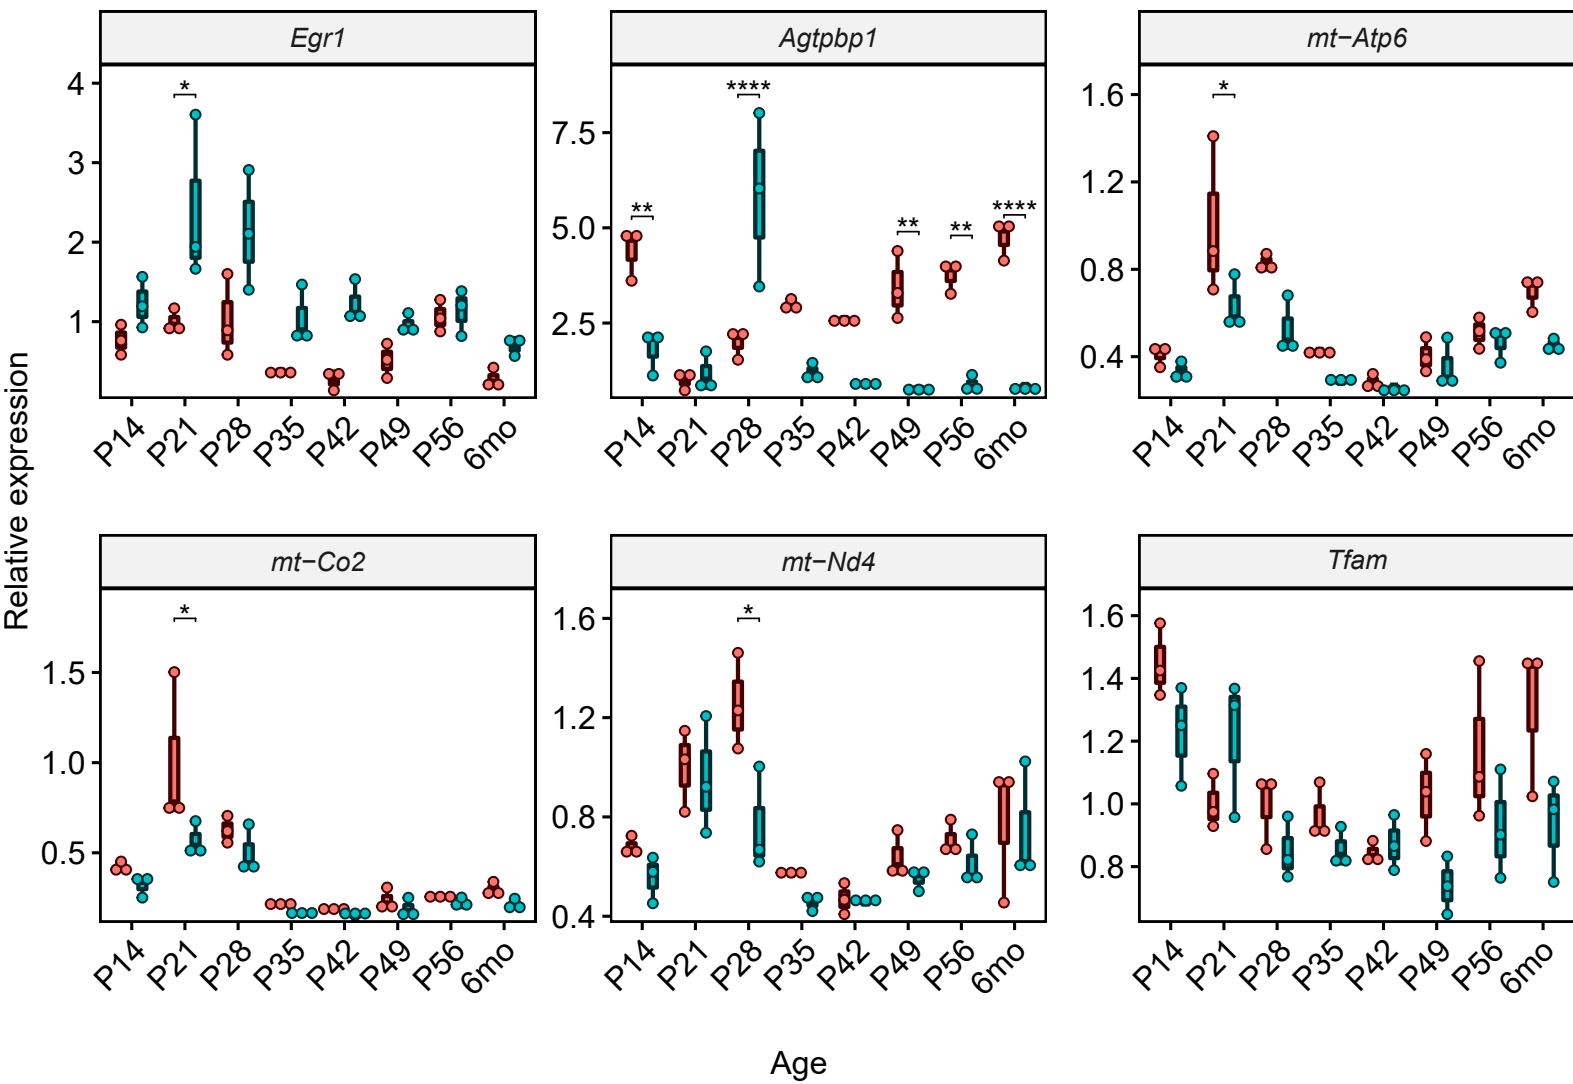

Supplement: 12915_2022_1280_MOESM12_ESM.pdf [file 12915_2022_1280_MOESM12_ESM.pdf]
